# Supplementary material for: Liquid crystal droplet-based amplification of microvesicles that are shed by mammalian cells
Source: Royal Society of Chemistry journal article supplement (doi:10.1039/c3an02360e), 2014-01-01
Supplement: c3an02360e1.pdf [file c3an02360e1.pdf]

## Liquid Crystal Droplet-Based Amplification of Microvesicles that are Shed by Mammalian Cells

Lie Na Tan<sup>a</sup>, Gregory J. Wiepz<sup>b</sup>, Daniel S. Miller<sup>a</sup>, Eric V. Shusta<sup>a</sup>, Nicholas L. Abbott<sup>a\*</sup>

<sup>a</sup>*Department of Chemical and Biological Engineering, University of Wisconsin-Madison, 1415 Engineering Drive, Madison, Wisconsin 53706, and* <sup>b</sup>*Department of Biomolecular Chemistry, University of Wisconsin-Madison, 1300 University Avenue, Madison, Wisconsin 53706.*

\* To whom all correspondence should be addressed. Tel: 608-265-5278. Fax: 608-262-5434. Email: [abbott@engr.wisc.edu](mailto:abbott@engr.wisc.edu).

### Electronic Supplementary Materials (ESI)

| lipid tails | mol % |
|-------------|-------|
| C14:0       | 2.2   |
| C16:1       | 4.7   |
| C16:0       | 23.2  |
| C18:2       | 20.6  |
| C18:1       | 32.5  |
| C18:0       | 16.7  |

**Figure S1:** GC-MS analysis of the lipids tails of A431 cells-derived MVs.

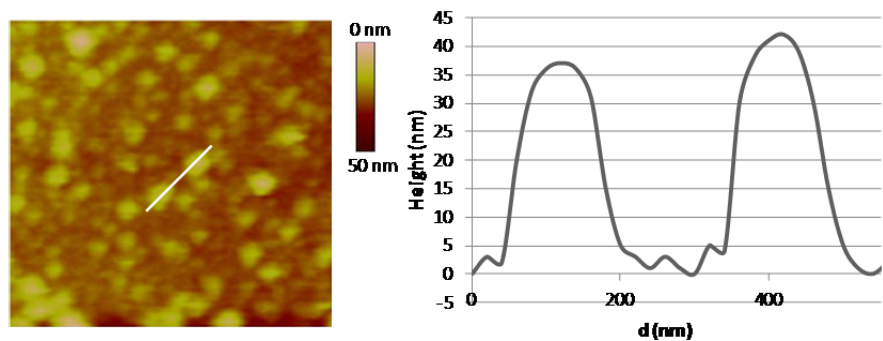

**Figure S2:** AFM image of a surface decorated with anti-EGFR 111.6 and subsequently incubated with MVs derived from A431 cells. The line corresponds to the location of the measurement of the cross sectional height (right plot).

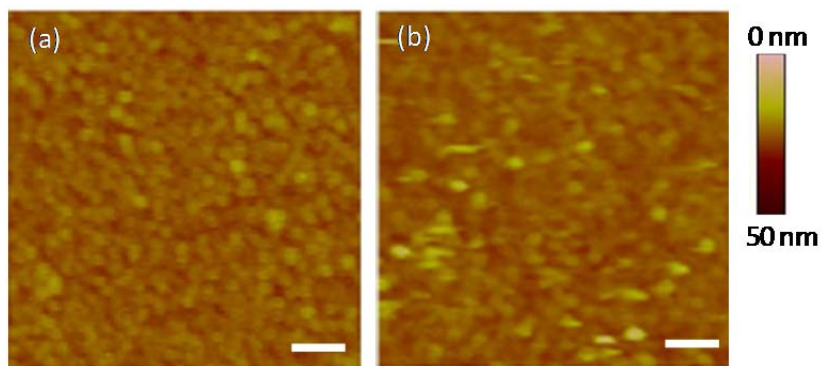

**Figure S3:** AFM images of (a) a surface decorated with an isotype control IgG and (b) a surface decorated with isotype control IgG and subsequently incubated with MVs derived from A431 cells (scale bar: 500 nm).

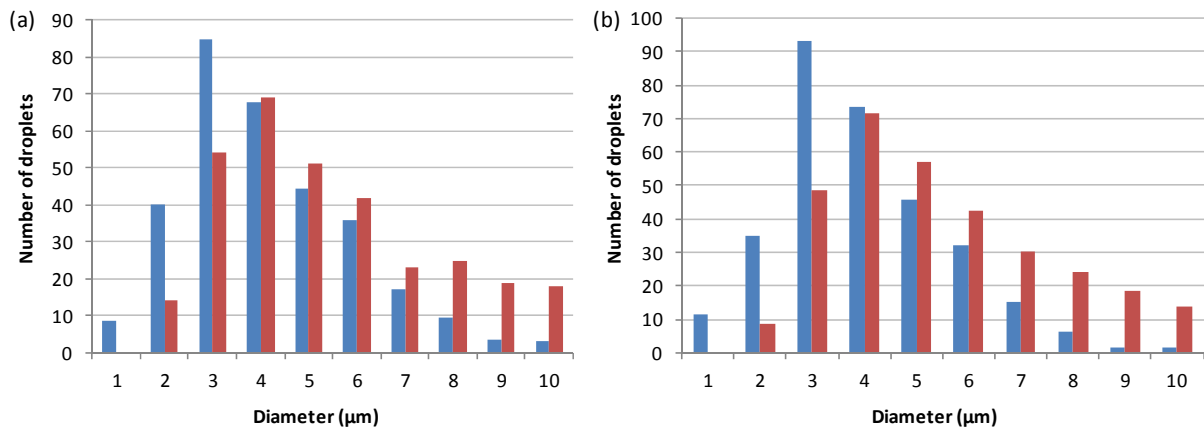

**Figure S4:** Time-dependent size distributions of LC droplets in the (a) absence and (b) presence of lipids extracted from MVs (blue bars – 0 h and red bars – 6 h).

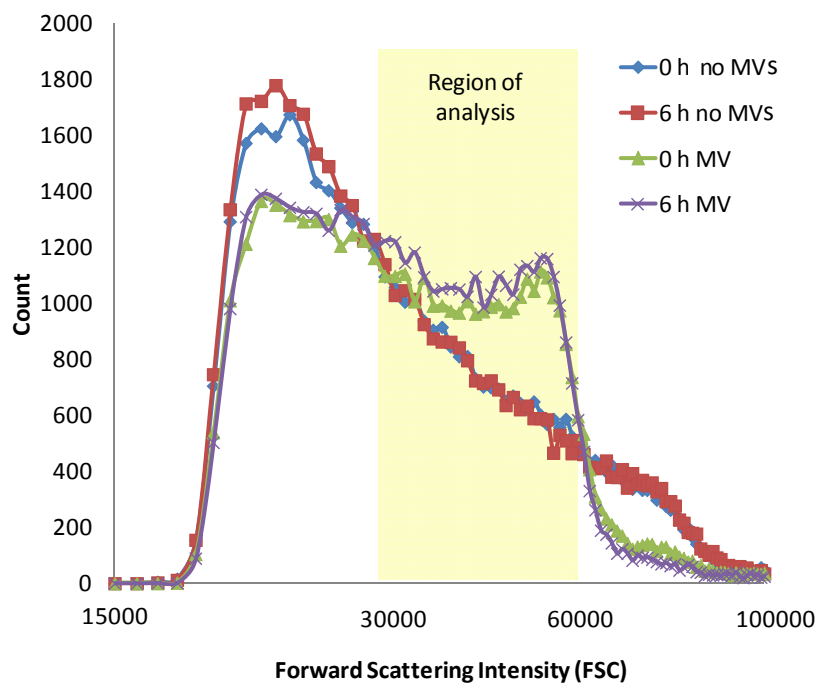

**Figure S5.** Frequency histogram for FSC obtained for radial (with MVs) and bipolar (no MVs) LC droplets at  $t = 0$  h and  $t = 6$  h.

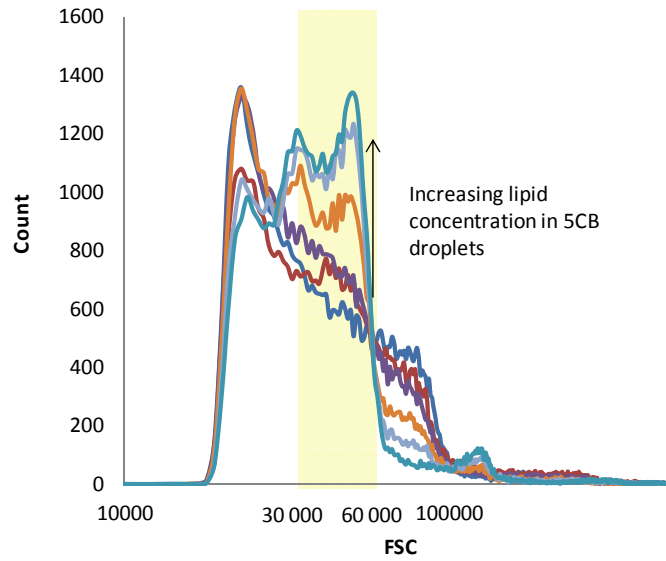

**Figure S6:** Frequency histogram for FSC obtained with increasing concentration of lipids in 5CB droplets.

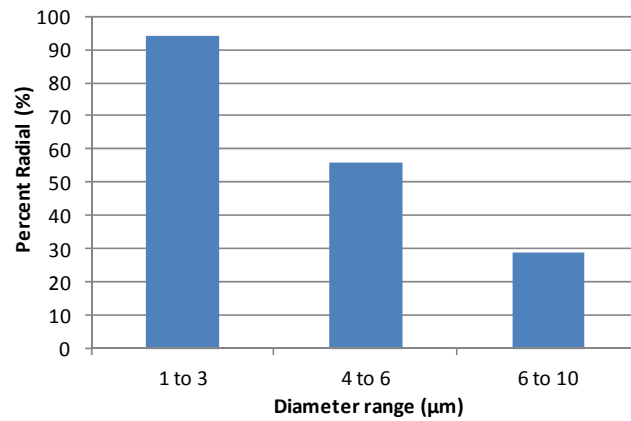

**Figure S7.** Percentage of radial LC droplets as a function of diameter of LC droplets in the presence of lipids extracted from  $5 \cdot 10^7$  MVs.

| $\mu\text{L of 5CB}$ | # of lipids per droplet |                |
|----------------------|-------------------------|----------------|
|                      | $10^7$ MVs              | $10^6$ MVs     |
| 1                    | $10^6$                  | $10^5$         |
| 0.3                  | $3 \cdot 10^6$          | $3 \cdot 10^5$ |
| 0.1                  | $10^7$                  | $10^6$         |
| 0.03                 | $3 \cdot 10^7$          | $3 \cdot 10^6$ |

**Table S1:** Theoretical amount of lipids in each droplet with a given amount of MVs and volume of 5CB used.
